# Supplementary material for: Movement and Genomic Methods Reveal Mechanisms Promoting Connectivity in a Declining Shorebird: The Lesser Yellowlegs
Source: MDPI journal article supplement (doi:10.3390/d15050595), 2023-04-26
Supplement: s1 [file s1]

Archive with 1 entries (1 files):
- diversity-2252330-supplementary.pdf
